# Supplementary material
Source: HighWire-hosted journal article supplement (https://erj.ersjournals.com/content/60/4/2103200)
Supplement: inline-supplementary-material-1 [file inline-supplementary-material-1.pdf]

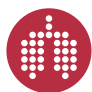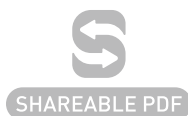

# Cancer risk in severe alpha-1-antitrypsin deficiency

Adriana-Maria Hiller <sup>1</sup>, Magnus Ekström <sup>2</sup>, Eeva Piitulainen<sup>1</sup>, Anne Lindberg <sup>3</sup>, Eva Rönmark <sup>4</sup> and Hanan Tanash<sup>1</sup>

<sup>1</sup>Dept of Respiratory Medicine and Allergology, Lund University, Skåne University Hospital, Malmö, Sweden. <sup>2</sup>Lund University, Faculty of Medicine, Dept of Clinical Sciences Lund, Respiratory Medicine and Allergology, Lund, Sweden. <sup>3</sup>Dept of Public Health and Clinical Medicine, Section of Medicine, the OLIN unit, Umeå University, Umeå, Sweden. <sup>4</sup>Dept of Public Health and Clinical Medicine, Section of Sustainable Health, the OLIN unit, Umeå University, Umeå, Sweden.

Corresponding author: Adriana-Maria Hiller ([adriana-maria.hiller@med.lu.se](mailto:adriana-maria.hiller@med.lu.se))

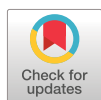

Shareable abstract (@ERSpublications)

**Individuals with severe alpha-1-antitrypsin deficiency appear to have an increased risk of developing cancer compared with the general population, even after adjustment for age, sex, smoking habits and liver disease.** <https://bit.ly/3ikSy0W>

**Cite this article as:** Hiller A-M, Ekström M, Piitulainen E, *et al.* Cancer risk in severe alpha-1-antitrypsin deficiency. *Eur Respir J* 2022; 60: 2103200 [DOI: 10.1183/13993003.03200-2021].

This single-page version can be shared freely online.

Copyright ©The authors 2022.  
For reproduction rights and  
permissions contact  
[permissions@ersnet.org](mailto:permissions@ersnet.org)

This article has an editorial  
commentary:  
<https://doi.org/10.1183/13993003.01289-2022>

Received: 19 Dec 2021  
Accepted: 12 March 2022

## Abstract

**Background** Severe alpha-1-antitrypsin deficiency (AATD), phenotype PiZZ, is a risk factor for pulmonary emphysema and liver disease, but its effect on cancer risk is unknown. Our aim was to evaluate the risk and the risk factors for incident cancer in PiZZ individuals compared with the general population with known smoking habits.

**Methods** A longitudinal study of PiZZ individuals (n=1595) from the Swedish National AATD Register, and controls (n=5999) from Swedish population-based cohorts. Data on cancer and mortality were obtained by cross-linkage with national registers. Individuals who had undergone lung transplantation (n=10) and those with a cancer diagnosis within 5 years prior to inclusion (n=63) were excluded. The risk factors for developing cancer were analysed using proportional hazards and Fine–Gray regression models, adjusting for age, sex, smoking habits and the presence of liver disease.

**Results** The median follow-up time was 17 years (interquartile range 11 years) for the whole study population. The incidence rates of hepatic and non-hepatic cancer per 1000 person-years were 1.6 (95% CI 1.1–2.3) and 8.5 (95% CI 7.2–10.0), respectively, for the PiZZ individuals, and 0.1 (95% CI 0.04–0.2) and 6.6 (95% CI 6.0–7.1), respectively, for the controls. The adjusted hazard ratios for hepatic and for non-hepatic cancer were 23.4 (95% CI 9.9–55.4) and 1.3 (95% CI 1.1–1.5), respectively, in the PiZZ individuals compared with the controls.

**Conclusion** These results suggest that individuals with severe AATD may have an increased risk of developing both hepatic and non-hepatic cancer, compared with the general population.
